# Supplementary material for: Complementary Transcriptomic and Proteomic Analysis Reveals a Complex Network Regulating Pollen Abortion in GMS (msc-1) Pepper (Capsicum annuum L.)
Source: MDPI journal article supplement (doi:10.3390/ijms20071789), 2019-04-11
Supplement: s1 [file s1]

## Supplementary materials

**Table S1** Overview of protein identification

| Order number | Total spectra | Spectra | Peptide | Unique peptide | Protein |
|--------------|---------------|---------|---------|----------------|---------|
| 16C1369A-1   | 82970         | 25183   | 20844   | 18348          | 2769    |
| 16C1369A-2   | 83893         | 24955   | 20653   | 18181          | 2823    |
| 16C1369A-3   | 82005         | 24350   | 20311   | 17893          | 3289    |
| 16C1369B-1   | 84636         | 25352   | 20306   | 17907          | 2571    |
| 16C1369B-2   | 84668         | 25391   | 20279   | 17848          | 2587    |
| 16C1369B-3   | 84044         | 25621   | 20440   | 18006          | 2756    |
| Total        | 502216        | 150852  | 29056   | 26108          | 4909    |

**Table S3** Summary of RNA sequencing and assembly

| Sample Name | Clean Reads | Genome Map Rate | Unique genes |
|-------------|-------------|-----------------|--------------|
| 16C1369A-1  | 47179448    | 89.07%          | 25168        |
| 16C1369A-2  | 39567516    | 88.84%          | 24941        |
| 16C1369A-3  | 45583918    | 88.47%          | 25035        |
| 16C1369B-1  | 46992664    | 87.75%          | 25454        |
| 16C1369B-2  | 43014098    | 87.38%          | 25176        |
| 16C1369B-3  | 41683754    | 88.76%          | 25221        |

Table S10. Primers used in this study.

| Gene name | Gene ID             | Forward sequence (5'→3')  | Reverse sequence (5'→3') |
|-----------|---------------------|---------------------------|--------------------------|
| ACOS5     | Capana02g003302     | CCAGCTGAATTAGAGGGGATCC    | CTCGTTTATAATGTGCAGCGGT   |
| PKSA      | Capana01g003460     | GGTGATCAACTGAAGGAGACCA    | CCCCATTCTTCACCACCATCTT   |
| PKSB      | Capana08g002676     | GGGCAGTTCATCCAGGTGG       | TGTGATTCCAGGACCAAATGCA   |
| MS2       | Capana03g003125     | AGGAAGTCAGTGGAGCAAGC      | CCTTAGCCCTGGAATGTGGA     |
| TKPR1     | Capana05g000665     | ACCAACTTGCCTCACTTCTATCA   | TCGTCAAACATCTCTCAATGGAC  |
| TKPR1     | Capana01g002831     | ACAGAAGGTTGGGGTTTGTTC     | CTATGTGCCATGTCTTCCCTT    |
| CYP704B   | Capana01g002203     | GAATACAATTGGGGCTCTGATGC   | CCCAGGCACCAACTTGAATTTAT  |
| ABCG26    | Capana07g002406     | AAGGGCTGGAATGGTTGCTT      | ACCAACAGTGTCAAATGAAGGTG  |
| AMS       | Capana08g000254     | AGACTGGTGGATTGTGAGGATC    | CTAGCCATTTCAGACCAACCTCT  |
| TDF1      | Capana04g001901     | AGTACACAGCTACTCCCTTCT     | GGCTGCTTTTCTCAACTTCAG    |
| ATXR6     | Capana03g001971     | CCGTGAAGCTGATGATGGAGAT    | CTCGGCTTTCACCATTAAACGTC  |
| A7        | Capana07g001721     | AGAAACTCACACGCGAATGTTG    | GCGTTCAGAGATGGGGAAACTA   |
| ACA9      | Capana03g000026     | CCCCTCTTCTCTGGTGTATAGG    | GGTGTCTTTGGAAGTGGGATGA   |
| 4CL3      | Capana03g001733     | CAAAAGGATGATGCTGCAGGG     | TGGCTCTCAGTCTTTCTCAG     |
| GATL4     | Capana01g003063     | TTTGCAGGAAACATCAAGGCAG    | TAACGCAACTCTGGATGAACGA   |
| ARO1      | Capana08g002699     | CCAAGCACCTAGTACCACATGT    | CGTGAGCCTCTGGACTGATAAA   |
| AGL62     | Trans_newGene_14655 | AGCGGAGAAGAAGAAGAAAGAGA   | GATCCTCAGCTCCAAATCTTGC   |
| FAS1      | Capana06g000774     | TGGCATTGATCAAGTCCCTGGAA   | ATGAGCAGCAGATTTCAAGTGGT  |
| LAP3      | Capana03g003177     | TACCTGGCTAGATTGATGGGGA    | ATGGAAGGGTGGCAATATGGTT   |
| PG2       | Capana11g001305     | AATGTCATTGTTCGAACCACCG    | TATCAGCTTCATAGACCCGCAC   |
| TA29      | Capana02g001969     | ATGTCCACGCAACAGTCCAT      | CTTCTCTCGCTGCTCTGAC      |
| TA1       | Capana04g001989     | AGTTGGGCATTACGGGATT       | TGGCCAGTCACAAAACCAGA     |
| UBI-3     | AY486137.1          | CACATGTACAAGACTGACAGGGCCA | AGACCCGTTCTTGTGACAACCCAC |

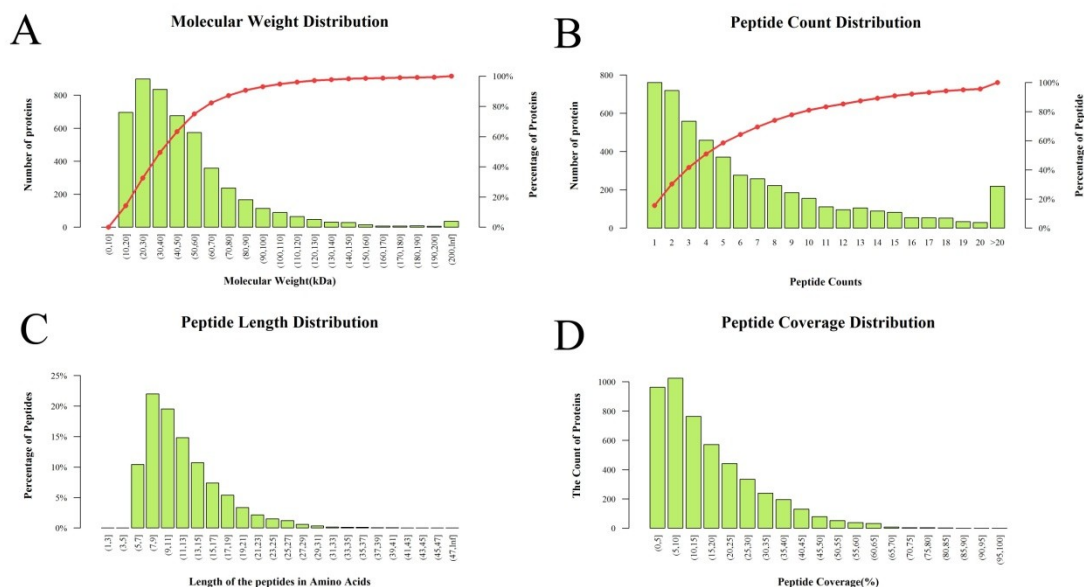

**Figure S1.** Summary of the label-free proteome. A: Molecular weights distribution of identified proteins; B: Number of peptides that match to unique proteins; C: Length distribution of identified peptides; D: Distribution of coverage of the proteins by the identified peptides.

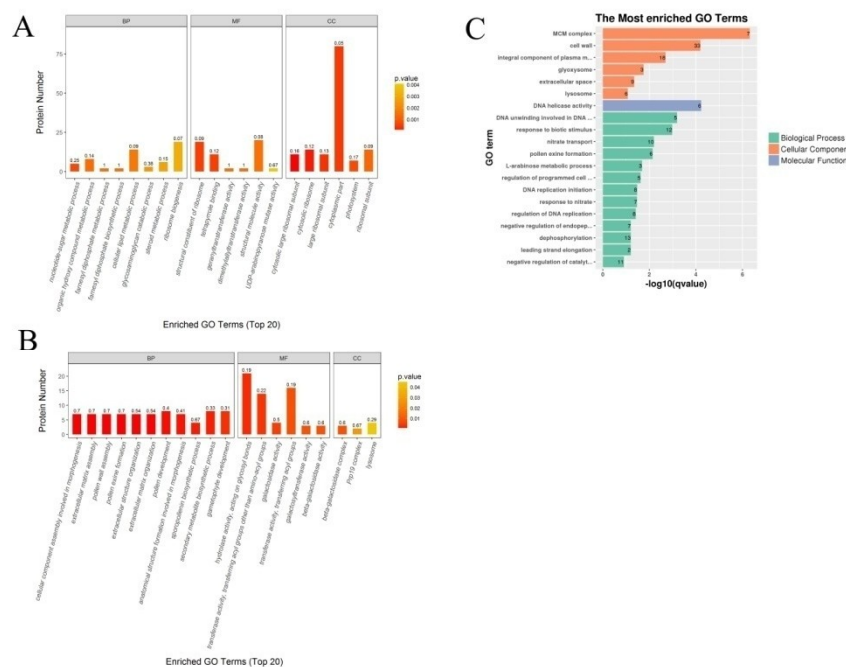

**Figure S2.** GO functional classification based on DEPs and DEGs. A:GO functional classification based on the 182 DEPs in the proteome; B:GO functional classification based on the 492 DEPs (presence/absence proteins) in the proteome; C: GO functional classification based on the 1069 DEGs in the transcriptome.

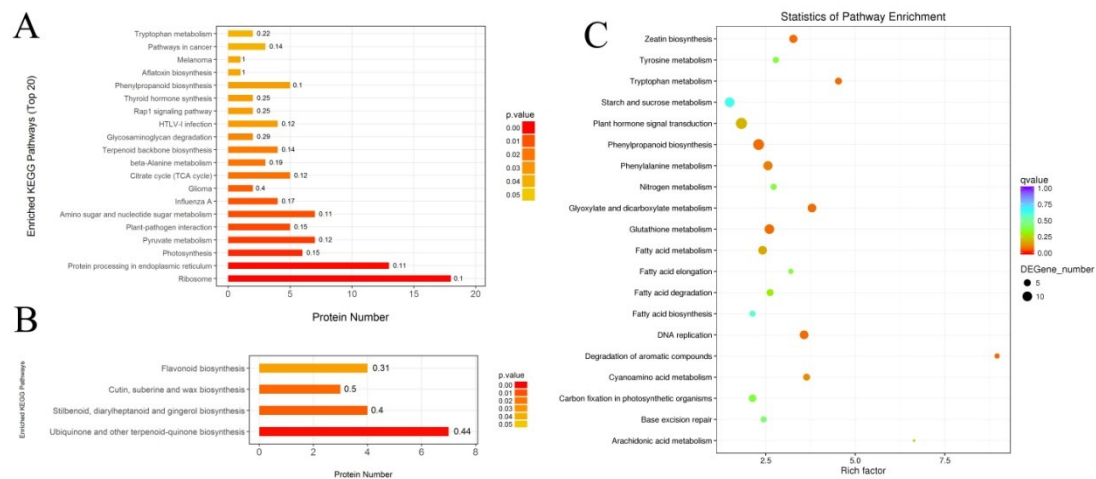

**Figure S3.** KEGG pathways associated with DEPs and DEGs. A: KEGG pathways associated with the 182 DEPs in the proteome; B: KEGG pathways associated with the 492 DEPs (presence/absence proteins) in the proteome; C: KEGG pathways associated with the 1069 DEGs in the transcriptome.
